# Supplementary material
Source: PubMed Central journal article supplement (PMC7610469)
Supplement: EMS115370-supplement-1.pdf [file EMS115370-supplement-1.pdf]

1        One supplementary Information provides additional information on the topic of mixed layer depth change in the Southern  
2 Ocean, thereby supporting findings discussed in the paper "Summertime increases in upper ocean stratification and mixed layer  
3 depth" by Sallée and co-authors.
